# Supplementary material for: Synthesis of Bioactive Nickel Nanoparticles Using Bacterial Strains from an Antarctic Consortium
Source: MDPI journal article supplement (doi:10.3390/md22020089), 2024-02-14
Supplement: s1 [file s1]

## Supplementary materials

Table S1: Characteristics of NiSNPs synthesized by the different Antarctic bacteria

| Characteristics                               | <i>Marinomonas</i>                                       | <i>Pseudomonas</i>                                      | <i>Rhodococcus</i>                                        | <i>Brevundimonas</i>                                   | <i>Bacillus</i>                                         |
|-----------------------------------------------|----------------------------------------------------------|---------------------------------------------------------|-----------------------------------------------------------|--------------------------------------------------------|---------------------------------------------------------|
| Visual observation                            | Deposition of the pale green extracellular aggregates    | Deposition of the pale green extracellular aggregates   | Deposition of the pale green extracellular aggregates     | Deposition of the pale green extracellular aggregates  | Deposition of the pale green extracellular aggregates   |
| Synthesis time                                | 24hrs                                                    | 24hrs                                                   | 24hrs                                                     | 24hrs                                                  | 24hrs                                                   |
| Uv spectroscopy                               | 421nm                                                    | 420nm                                                   | 422nm                                                     | 421nm                                                  | 400nm                                                   |
| Dynamic Light Scattering                      | 42.3 nm                                                  | 42.1nm                                                  | 44.8nm                                                    | 40.7nm                                                 | 40.5nm                                                  |
| Zeta potential measurement                    | – 32.2 mV                                                | – 28.5mV                                                | – 31.1 mV                                                 | – 30.6 mV                                              | – 29.3 mV                                               |
| Transmission electron microscopy (size range) | Rods and spherical<br>Spherical - 20-30nm Rods - 40-50nm | Rods and spherical<br>Spherical - 20-30nm Rods -30-50nm | Rods and spherical<br>Spherical - 15-30nm Rods of 25-50nm | Rods and spherical<br>Spherical -20-30nm Rod - 40-50nm | Rods and spherical<br>Spherical - 20-30nm Rods -30-50nm |
| X-ray powder diffraction analysis             | Crystalline formation of a Ni monosulfide phase          | Crystalline formation of a Ni monosulfide phase         | Crystalline formation of a Ni monosulfide phase           | Crystalline formation of a Ni monosulfide phase        | Crystalline formation of a Ni monosulfide phase         |

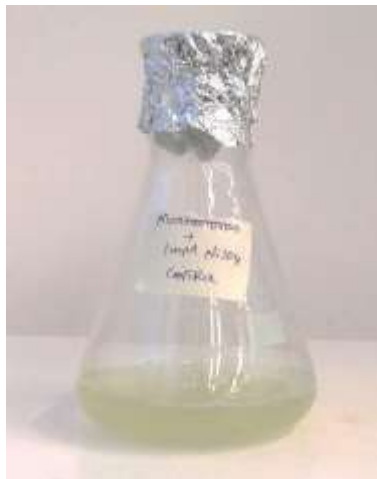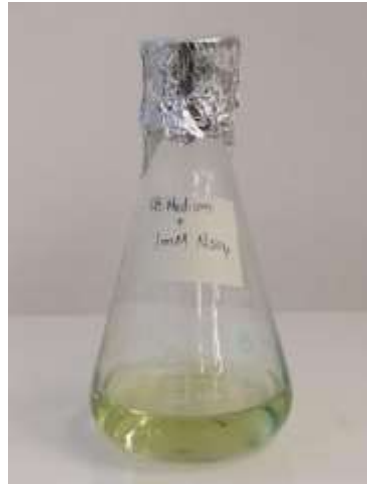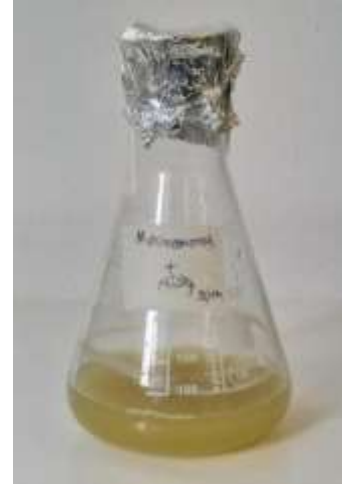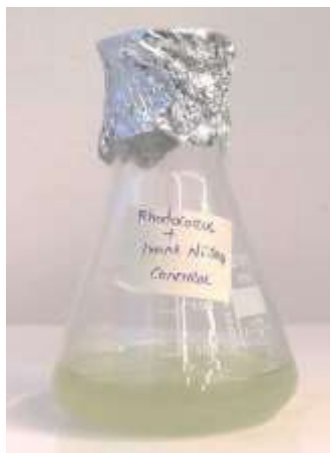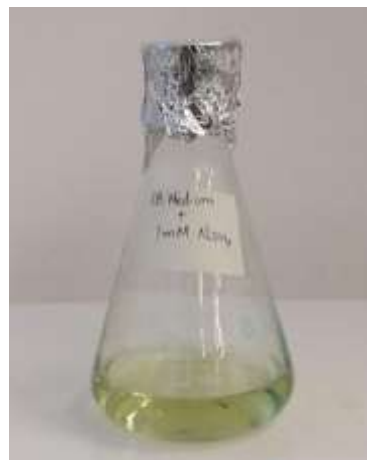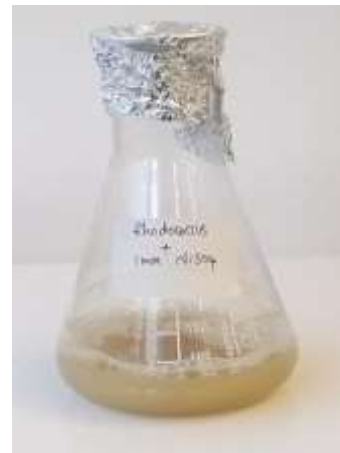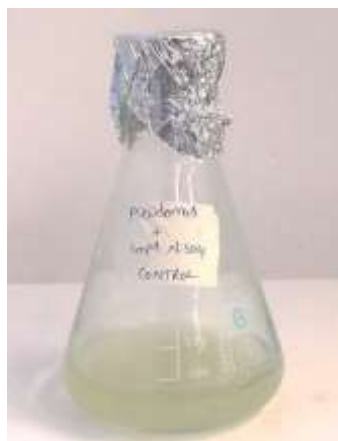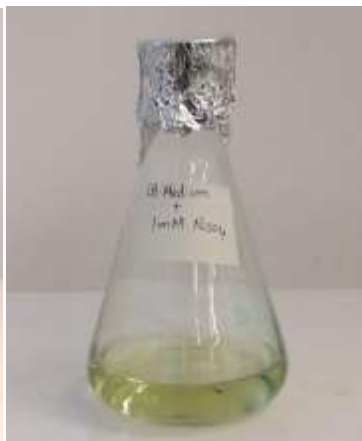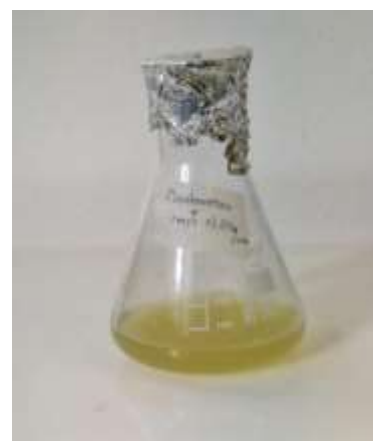

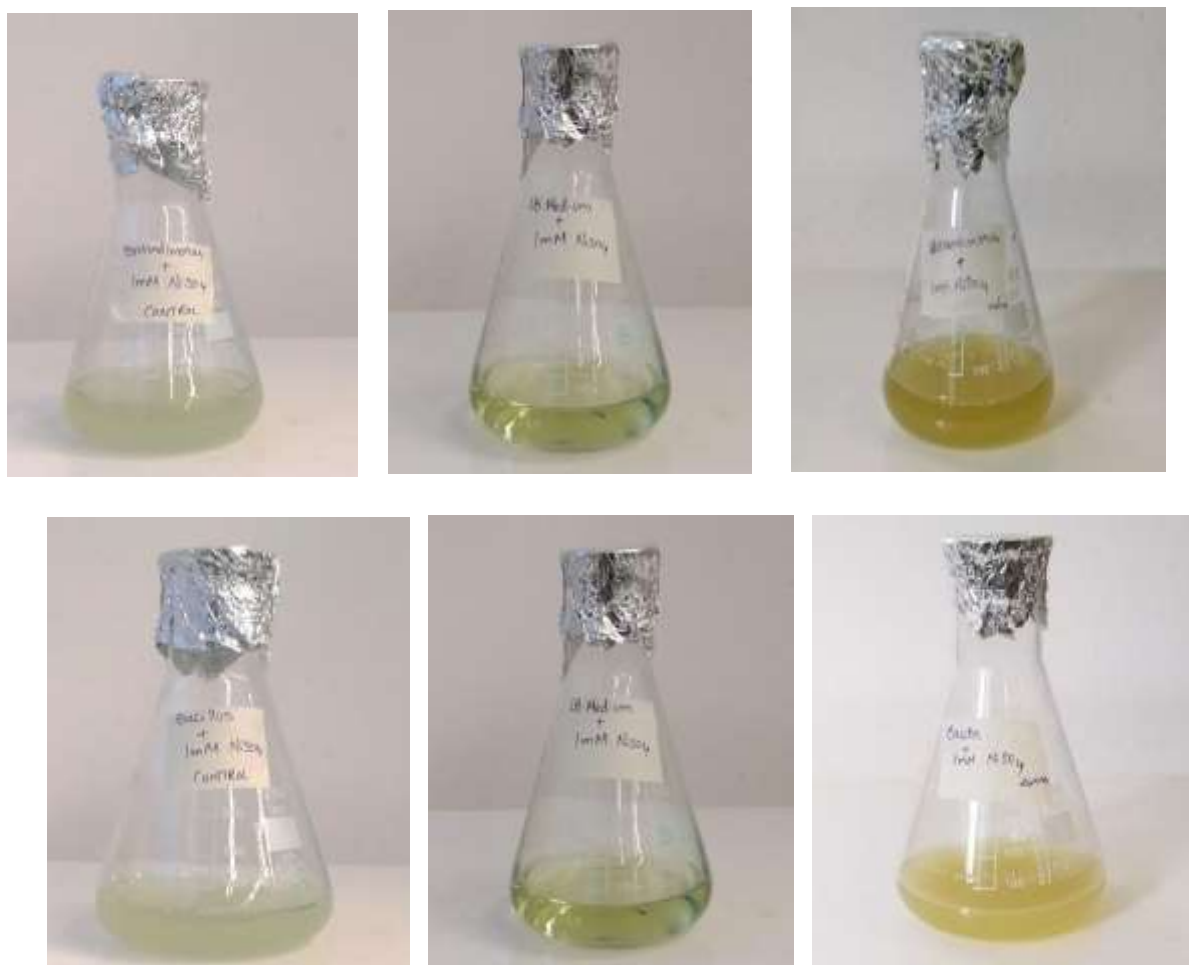

**Figure S1:** Biosynthesis of NiSNPs from *Marinomonas*, *Rhodococcus* ef1, *Brevundimonas* ef1, *Marinomonas* ef1, *Pseudomonas* ef1 and *Bacillus* ef1, respectively. Left panels: heat killed bacterial biomass with 1mM NiSO<sub>4</sub>; Central panel: LB medium with 1mM NiSO<sub>4</sub>; right panel: Biosynthesized NiSNPs

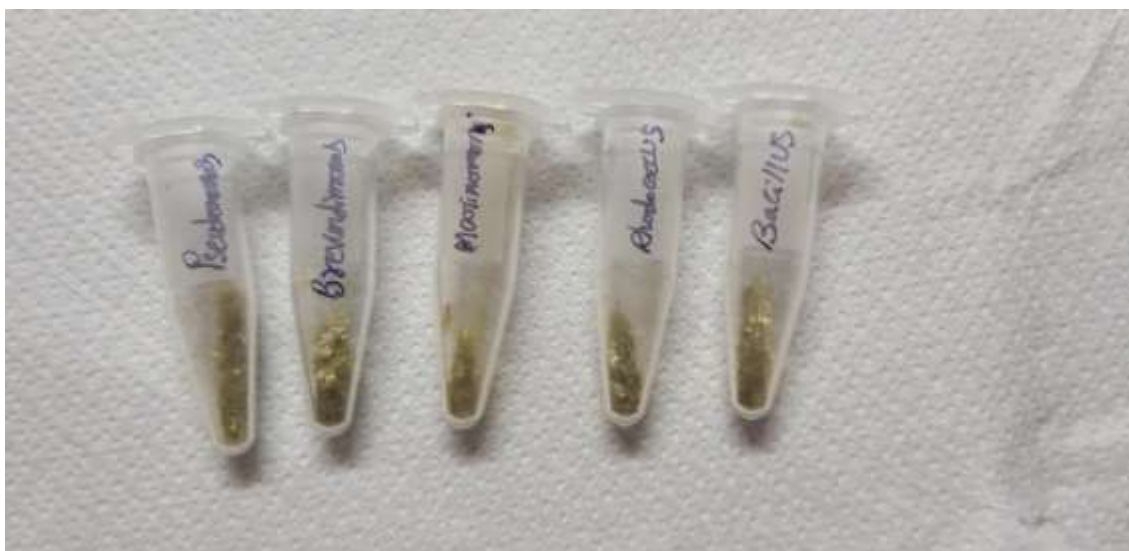

**Figure S2.** Purified NiSNPs from *Rhodococcus* ef1, *Brevundimonas* ef1, *Marinomonas* ef1, *Pseudomonas* ef1 and *Bacillus* ef1.

**Table S2.** Pathogens inhibition growth (expressed as diameter in mm) in the presence of bacterial NiSNPs and  $\text{NiSO}_4$  (1mM), used as a control to verify the effect of nanoparticles and not of the salt.

|                                | <i>Marinomonas</i> | <i>Rhodococcus</i> | <i>Brevundimonas</i> | <i>Pseudomonas</i> | <i>Bacillus</i> | $\text{NiSO}_4$ |
|--------------------------------|--------------------|--------------------|----------------------|--------------------|-----------------|-----------------|
| <i>Staphylococcus aureus</i>   | 14±0.2             | 15±0.2             | 14±0.3               | 14±0.1             | 15±0.1          | 11±0.2          |
| <i>Escherichia coli</i>        | 14±0.2             | 14±0.2             | 13±0.3               | 14±0.2             | 13±0.4          | 9±0.2           |
| <i>Klebsiella pneumoniae</i>   | 14±0.1             | 12±0.2             | 15±0.4               | 12±0.3             | 12±0.3          | 9±0.4           |
| <i>Pseudomonas sp</i>          | 15±0.2             | 15±0.3             | 13±0.3               | 15±0.1             | 16±0.2          | 11±0.2          |
| <i>Proteus mirabilis</i>       | 14±0.3             | 15±0.4             | 13±0.2               | 13±0.2             | 12±0.3          | 9±0.1           |
| <i>Citrobacter koseri</i>      | 14±0.2             | 13±0.4             | 13±0.2               | 13±0.3             | 14±0.2          | 9±0.4           |
| <i>Acinetobacter baumannii</i> | 15±0.1             | 14±0.1             | 12±0.2               | 13±0.4             | 13±0.1          | 11±0.4          |
| <i>Serratia marcescens</i>     | 14±0.2             | 12±0.2             | 13±0.1               | 13±0.2             | 13±0.2          | 8±0.3           |
| <i>Candida albicans</i>        | 16±0.2             | 16±0.3             | 13±0.4               | 15±0.2             | 14±0.2          | 11±0.4          |
| <i>Candida parapsilosis</i>    | 15±0.1             | 15±0.2             | 13±0.2               | 14±0.3             | 15±0.1          | 11±0.3          |

## Supplementary results

### 1. FTIR spectroscopic analysis

***Marinomonas ef1*** showed the peak at  $3252.83\text{ cm}^{-1}$  corresponds to O–H stretching carboxylic acids. Characteristic peaks at  $2958.72\text{ cm}^{-1}$  indicate the possible presence of Aliphatic compounds  $\text{CH}_3$  and  $-\text{CH}_2$  stretch. The peak at  $1560.76\text{ cm}^{-1}$  is attributed to N–H bend secondary amides. The sharp peak at  $1402.29\text{ cm}^{-1}$  indicates C–N in primary amides. The peak at  $1105.11\text{ cm}^{-1}$  is primarily due to C–N stretching of aliphatic amines and the peak at  $609.63\text{ cm}^{-1}$  is characteristic of NO<sub>2</sub> deformation in aliphatic nitro compounds.

FTIR spectrum of NiS NPs from *Marinomonas ef1*

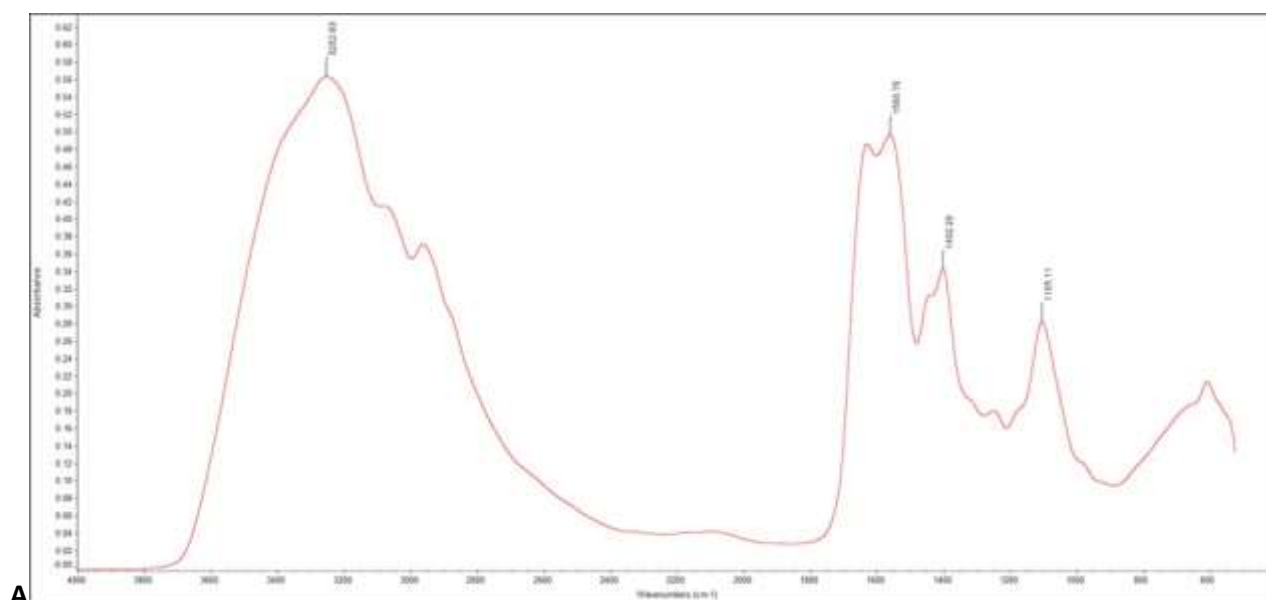

B

| Absorption $\text{cm}^{-1}$ | Functional group                                                | Characteristic Absorption(s)( $\text{cm}^{-1}$ ) |
|-----------------------------|-----------------------------------------------------------------|--------------------------------------------------|
| 3252.83                     | -OH group in alcohols and phenols                               | 3260-3240                                        |
| 2958.72                     | $\text{CH}_3$ and $-\text{CH}_2$ stretch in Aliphatic compounds | 2990-2850                                        |
| 1560.76                     | N-H stretch in secondary amides                                 | 1565-1475                                        |
| 1402.29                     | C-N stretch in primary amides                                   | 1420-1400                                        |
| 1105.11                     | C-C-N bending in amines                                         | 1230-1100                                        |

***Rhodococcus ef1*** showed the peak at  $3241.08\text{ cm}^{-1}$  corresponds to O–H stretching [carboxylic acids](#). Characteristic peak at  $2959.96\text{ cm}^{-1}$  indicate the possible presence of Aliphatic compounds  $\text{CH}_3$  and  $-\text{CH}_2$

stretch. The peak at  $1566.58\text{ cm}^{-1}$  is attributed to NO in aliphatic nitro compounds. The sharp peak at  $1399.16\text{ cm}^{-1}$  indicates COO- group in carboxylic acid salts. The peak at  $1100.68\text{ cm}^{-1}$  is primarily due to C–N stretching of aliphatic amines and the peak at  $609.63\text{ cm}^{-1}$  is characteristic of NO deformation in aliphatic nitro compounds.

#### FTIR spectrum of NiS NPs from Rhodococcus

A

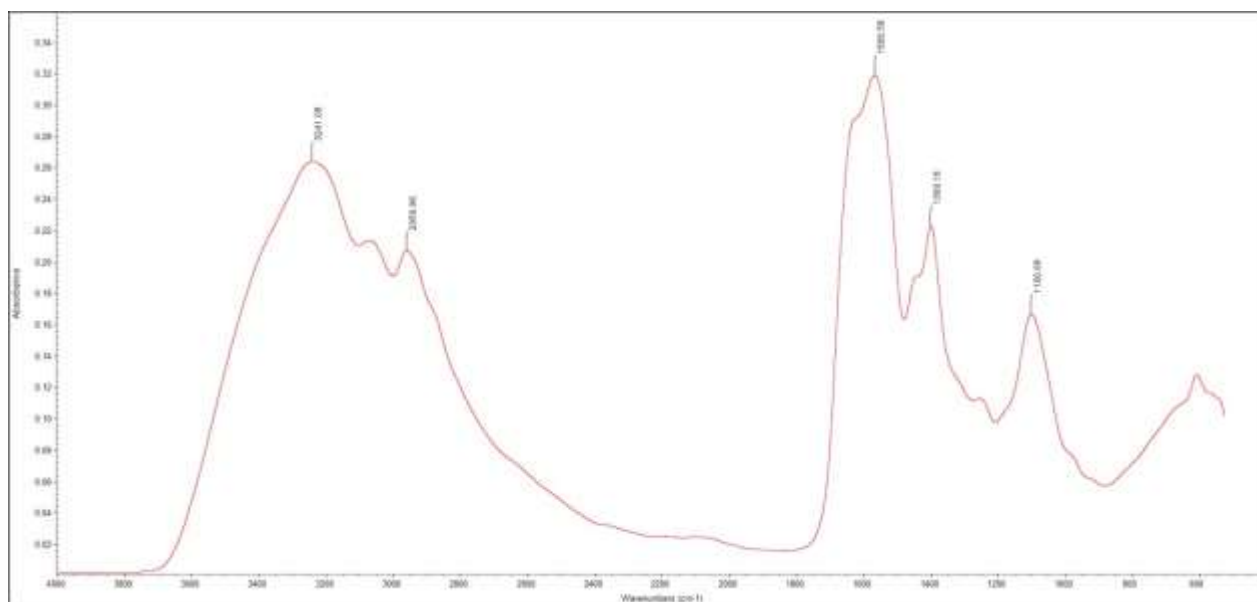

B

| Absorption $\text{cm}^{-1}$ | Functional group                                                    | Characteristic Absorption(s)( $\text{cm}^{-1}$ ) |
|-----------------------------|---------------------------------------------------------------------|--------------------------------------------------|
| 3241.08                     | -OH group in alcohols and phenols                                   | 3260-3240                                        |
| 2959.96                     | CH <sub>3</sub> and –CH <sub>2</sub> stretch in Aliphatic compounds | 2990-2850                                        |
| 1566.58                     | NO <sub>2</sub> stretch in aliphatic nitro compounds                | 1575-1545                                        |
| 1399.16                     | COO- group in carboxylic acid salts                                 | 1400-1310                                        |
| 1100.68                     | C-C-N bending in amines                                             | 1230-1100                                        |

*Pseudomonas* ef1 showed the peak at  $3259.31\text{ cm}^{-1}$  corresponds to O–H stretching [carboxylic acids](#).

Characteristic peak at  $2954.43\text{ cm}^{-1}$  indicates the possible presence of Aliphatic compounds CH and  $-\text{CH}$  stretch. The peak at  $1576.72\text{ cm}^{-1}$  is attributed to NO in aliphatic nitro compounds. The sharp peak at  $1399.63\text{ cm}^{-1}$  indicates  $\text{COO}^-$  group in carboxylic acid salts. The peak at  $1104.24\text{ cm}^{-1}$  is primarily due to C–N stretching of aliphatic amines and the peak at  $609.63\text{ cm}^{-1}$  is characteristic of NO deformation in aliphatic nitro compounds.

#### FTIR spectrum of NiS NPs from *Pseudomonas* ef1

A

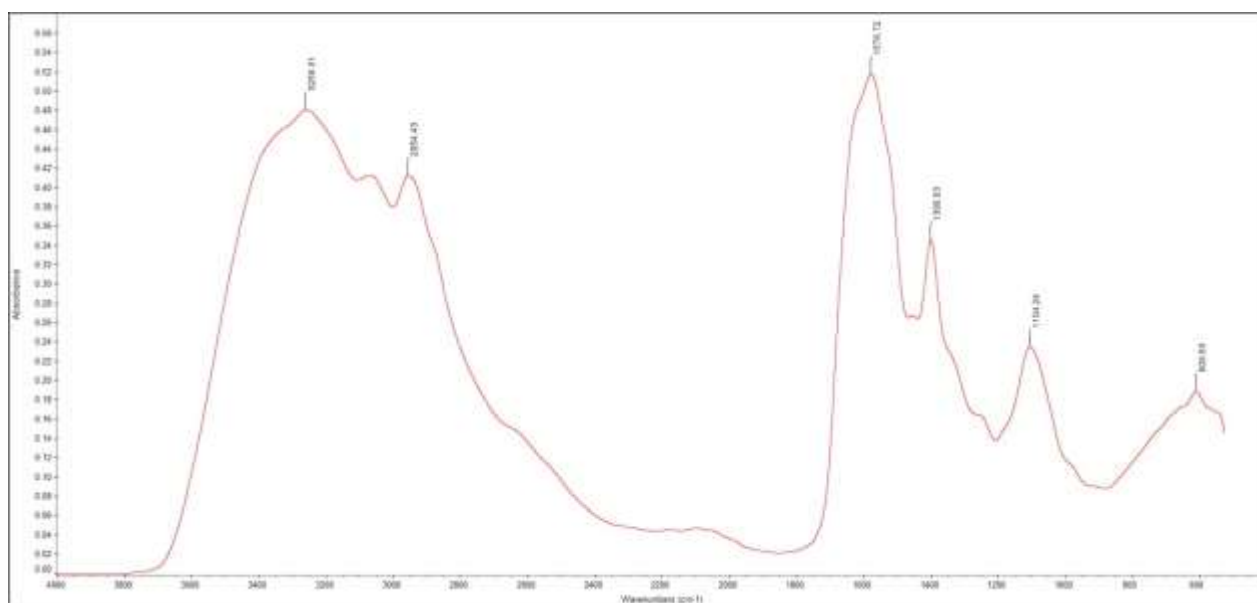

B

| Absorption $\text{cm}^{-1}$ | Functional group                                                | Characteristic Absorption(s)( $\text{cm}^{-1}$ ) |
|-----------------------------|-----------------------------------------------------------------|--------------------------------------------------|
| 3259.31                     | -OH group in alcohols and phenols                               | 3260-3240                                        |
| 2954.43                     | $\text{CH}_3$ and $-\text{CH}_2$ stretch in Aliphatic compounds | 2990-2850                                        |
| 1576.72                     | $\text{COO}^-$ group in carboxylic acid salts                   | 1610-1560                                        |
| 1399.63                     | $\text{COO}^-$ group in carboxylic acid salts                   | 1400-1310                                        |
| 1104.24                     | C-C-N bending in amines                                         | 1230-1100                                        |
| 609.63                      | $\text{NO}_2$ deformation in aliphatic nitro compounds          | 650-600                                          |

*Brevundimonas* ef1 showed the peak at  $3242.15\text{ cm}^{-1}$  corresponds to O–H stretching [carboxylic acids](#). Characteristic peak at  $2958.72\text{ cm}^{-1}$  indicate the possible presence of Aliphatic compounds  $\text{CH}_3$  and  $-\text{CH}_2$  stretch. The peaks at  $1561.84\text{ cm}^{-1}$  and  $1561.84\text{ cm}^{-1}$  are attributed to  $\text{NO}_2$  in aliphatic nitro compounds and  $-\text{NH}_2$  stretch of primary amines. The sharp peak at  $1398.80\text{ cm}^{-1}$  indicates  $\text{COO}^-$  group in carboxylic acid

salts. The peak at  $1104.38\text{ cm}^{-1}$  is primarily due to C-C-N bending in amines and the peak at  $608.30\text{ cm}^{-1}$  is characteristic of  $\text{NO}_2$  deformation in aliphatic nitro compounds.

**FTIR spectrum of NiS NPs from *Brevundimonas ef1***

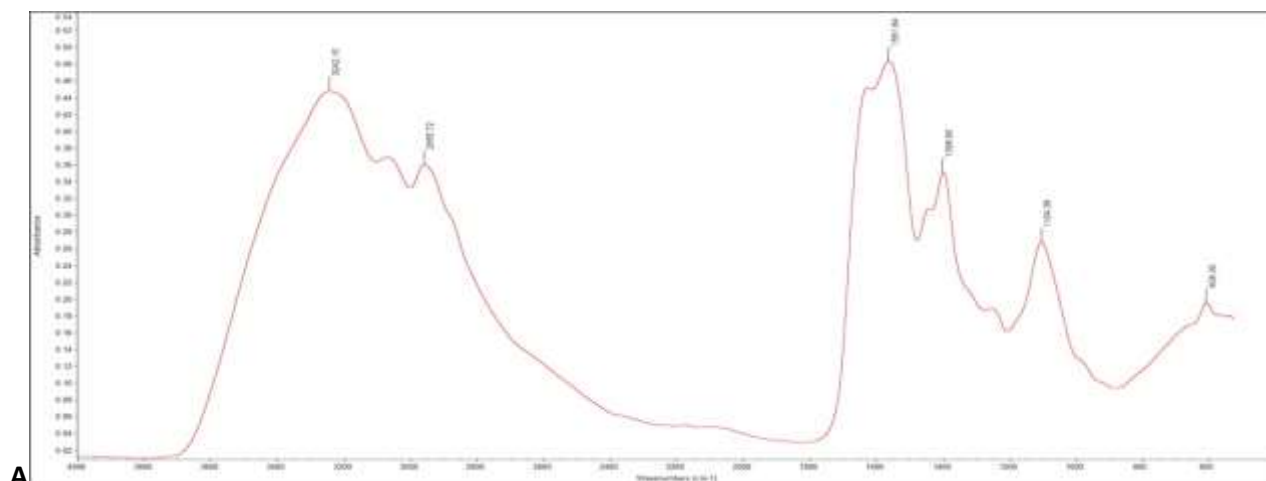

**B**

| Absorption $\text{cm}^{-1}$ | Functional group                                                | Characteristic Absorption(s)( $\text{cm}^{-1}$ ) |
|-----------------------------|-----------------------------------------------------------------|--------------------------------------------------|
| 3242.15                     | -OH group in alcohols and phenols                               | 3260-3240                                        |
| 2958.72                     | $\text{CH}_3$ and $-\text{CH}_2$ stretch in Aliphatic compounds | 2990-2850                                        |
| 1561.84                     | $\text{NO}_2$ stretch in aliphatic nitrocompounds               | 1570-1550                                        |
| 1561.84                     | $-\text{NH}_2$ stretch of primary amines                        | 1610-1580                                        |
| 1398.80                     | $\text{COO}^-$ group in carboxylic acid salts                   | 1400-1310                                        |
| 1104.38                     | C-C-N bending in amines                                         | 1230-1100                                        |
| 608.30                      | $\text{NO}_2$ deformation in aliphatic nitro compounds          | 650-600                                          |

*Bacillus ef1* showed the peak at  $3242.15\text{ cm}^{-1}$  corresponds to O-H stretching [carboxylic acids](#). Characteristic peak at  $2958.72\text{ cm}^{-1}$  indicate the possible presence of Aliphatic compounds  $\text{CH}_3$  and  $-\text{CH}_2$  stretch. The peak at  $1561.84\text{ cm}^{-1}$  is attributed to  $\text{NO}_2$  in aliphatic nitro compounds. The sharp peak at  $1398.80\text{ cm}^{-1}$  indicates  $\text{COO}^-$  group in carboxylic acid salts. The peak at  $1104.38\text{ cm}^{-1}$  is primarily due to C-C-N bending in amines and the peak at  $608.30\text{ cm}^{-1}$  is characteristic of  $\text{NO}_2$  deformation in aliphatic nitro compounds.



# FTIR spectrum of NiS NPs from *Bacillus* ef1

A

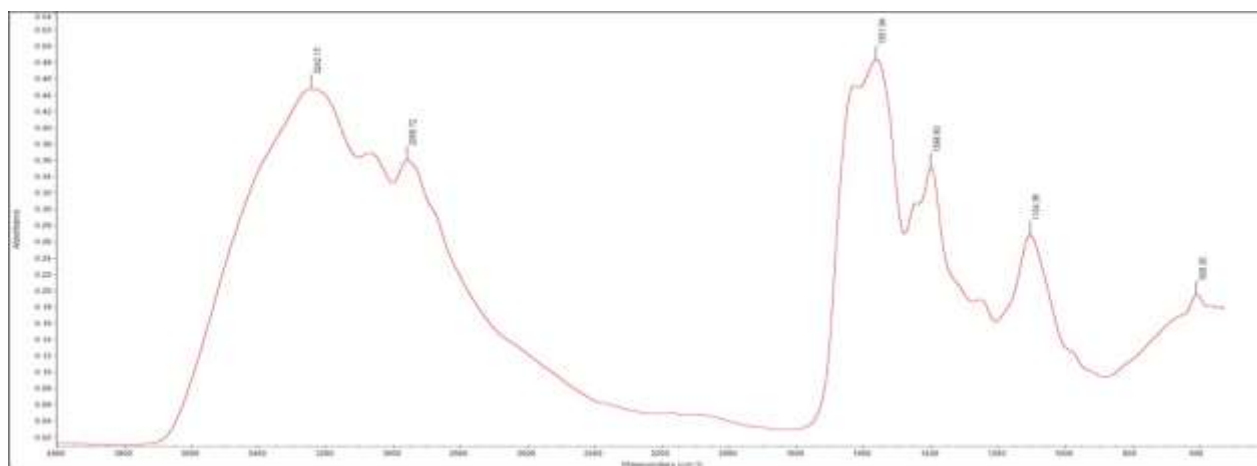

B

| Absorption $\text{cm}^{-1}$ | Functional group                                                | Characteristic Absorption(s)( $\text{cm}^{-1}$ ) |
|-----------------------------|-----------------------------------------------------------------|--------------------------------------------------|
| 3242.15                     | -OH group in alcohols and phenols                               | 3260-3240                                        |
| 2958.72                     | $\text{CH}_3$ and $-\text{CH}_2$ stretch in Aliphatic compounds | 2990-2850                                        |
| 1561.84                     | $\text{NO}_2$ stretches in aliphatic nitro compounds            | 1570-1550                                        |
| 1398.80                     | $\text{COO}^-$ group in carboxylic acid salts                   | 1400-1310                                        |
| 1104.38                     | C-C-N bending in amines                                         | 1230-1100                                        |

|        |                                                          |         |
|--------|----------------------------------------------------------|---------|
| 608.30 | NO <sub>2</sub> deformation in aliphatic nitro compounds | 650-600 |
|--------|----------------------------------------------------------|---------|

## 2 MIC and MBC/MFC Assay

MIC values of *Marinomonas ef1* synthesized NiSNPs are shown in **Figure-S3**. Among the Gram-negative bacteria, *Proteus mirabilis* shows the lowest MIC of 3.12 µg/mL. *Citrobacter koseri* and *Serratia marcescens* show MIC values of 6.25 µg/mL. *Klebsiella pneumoniae*, *Pseudomonas aeruginosa* and *Acinetobacter baumannii* show MIC values of 12.5 µg/mL. *Escherichia coli* shows a MIC value of 25 µg/mL. The gram positive bacterium *Staphylococcus aureus* shows a MIC value of 12.5 µg/mL. Among fungi, the lowest MIC value of 12.5 µg/mL is shown in *Candida parapsilosis*, while *Candida albicans* shows a MIC value of 25 µg/mL.

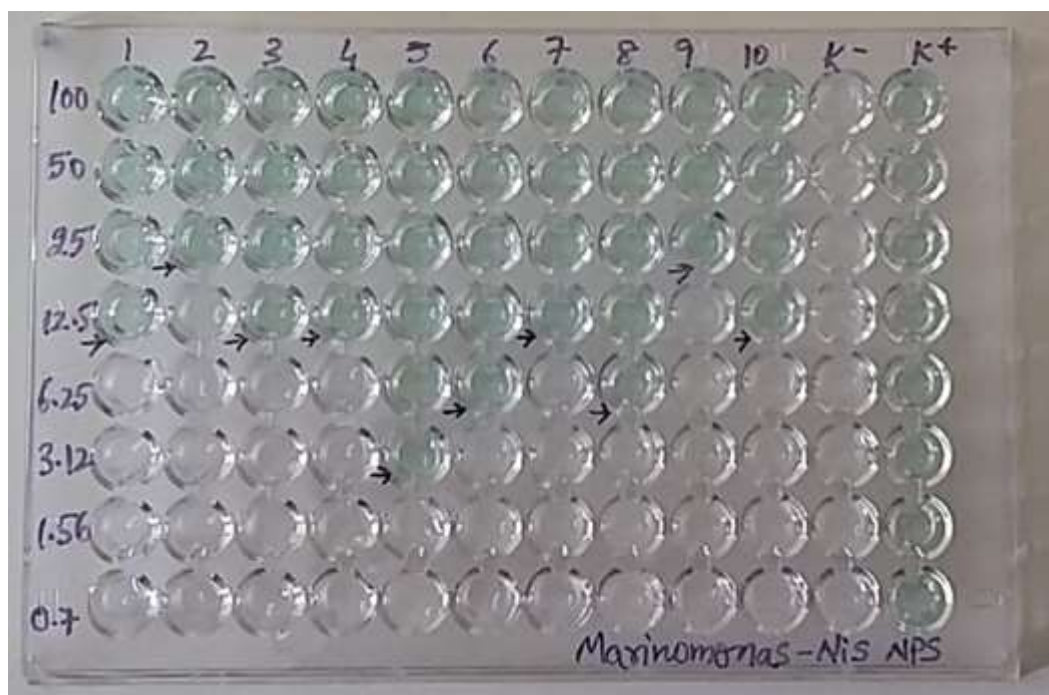

**Figure-S3.** MIC assay of the NiSNPs synthesized by *Marinomonas ef1* by Broth microdilution method. 1. *Staphylococcus aureus* 2. *Escherichia coli* 3. *Klebsiella pneumoniae* 4. *Pseudomonas aeruginosa* 5. *Proteus mirabilis* 6. *Citrobacter koseri* 7. *Acinetobacter baumannii* 8. *Serratia marcescens* 9. *Candida albicans* 10. *Candida parapsilosis*. Positive control contains only medium (K+) and Negative control contains medium and bacterial inoculums (K-).

Among gram negative bacteria, *Proteus mirabilis* shows the lowest MBC value of 6.25 µg/mL, while *Pseudomonas aeruginosa*, *Citrobacter koseri* and *Acinetobacter baumannii* and *Serratia marcescens* show MBC values of 12.5 µg/mL. *Escherichia coli* and *Klebsiella pneumoniae* show MBC values of 25 µg/mL. The gram positive bacterium *Staphylococcus aureus* shows a MBC value of 25 µg/mL. The Fungi *Candida albicans* and *Candida parapsilosis* show MFC values of 25 µg/mL.

MIC values of *Rhodococcus* synthesized NiSNPs are shown in **Figure-S4**. Among Gram negative bacteria, *Proteus mirabilis*, *Acinetobacter baumannii* and *Serratia marcescens* show the lowest MIC values of 6.25  $\mu\text{g/mL}$ , whereas *Escherichia coli*, *Klebsiella pneumonia*, *Pseudomonas aeruginosa* and *Citrobacter koseri* show MIC values of 12.5  $\mu\text{g/mL}$ . *Escherichia coli*, *Pseudomonas aeruginosa*, *Citrobacter koseri* and *Acinetobacter baumannii* show MIC values of 12.5  $\mu\text{g/mL}$ . The gram positive bacteria *Staphylococcus aureus* shows a MIC value of 25  $\mu\text{g/mL}$ . Among fungi, the lowest MIC value of 12.5  $\mu\text{g/mL}$  is noted in *Candida albicans*, while *Candida parapsilosis* shows a MIC value of 25  $\mu\text{g/mL}$ .

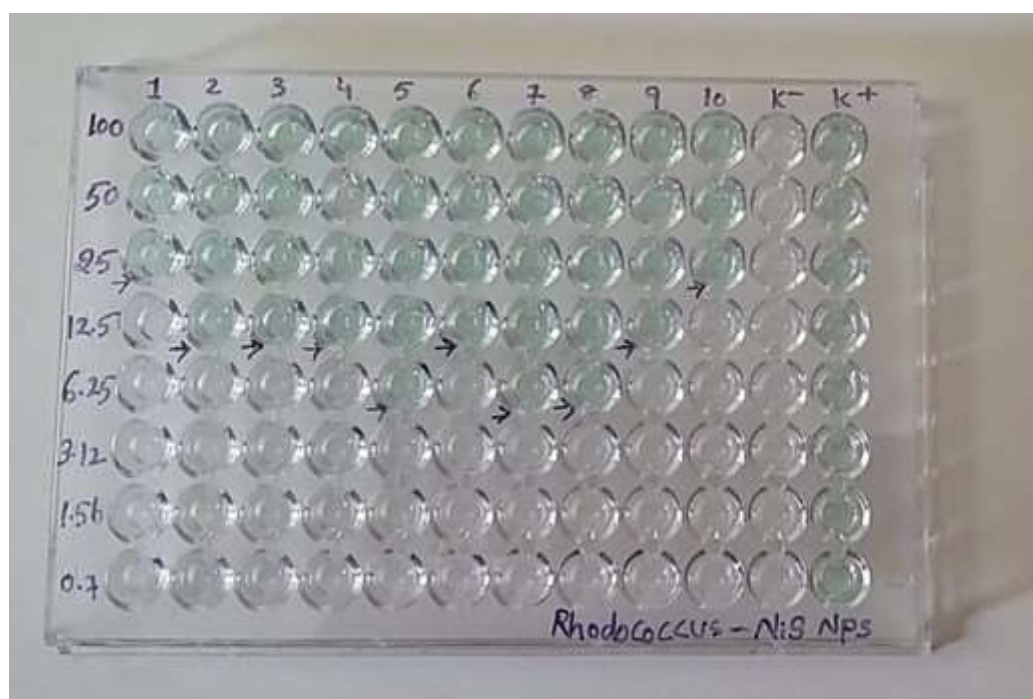

**Figure-S4.** MIC assay of the NiS NPs synthesized by *Rhodococcus* by Broth microdilution method. 1. *Staphylococcus aureus* 2. *Escherichia coli* 3. *Klebsiella pneumoniae* 4. *Pseudomonas sp* 5. *Proteus mirabilis* 6. *Citrobacter koseri* 7. *Acinetobacter baumannii* 8. *Serratia marcescens* 9. *Candida albicans* 10. *Candida parapsilosis*.

The lowest MBC value among gram negative bacteria of 12.5  $\mu\text{g/mL}$  is shown by *Proteus mirabilis*, *Citrobacter koseri*, *Acinetobacter baumannii* and *Serratia marcescens*. *Escherichia coli*, *Klebsiella pneumonia* and *Pseudomonas aeruginosa* showed MBC values of 25  $\mu\text{g/mL}$ . The gram positive bacterium *Staphylococcus aureus* showed an MBC of 25  $\mu\text{g/mL}$ . The Fungi *Candida albicans* and *Candida parapsilosis* also showed MFC values of 25  $\mu\text{g/mL}$ .

MIC values of *Pseudomonas* ef1 synthesized NiSNPs are shown in **Figure-S5**. Among Gram-negative bacteria, *Proteus mirabilis* and *Citrobacter koseri* show the lowest MIC value of 6.25 µg/mL, whereas *Pseudomonas aeruginosa*, *Acinetobacter baumannii* and *Serratia marcescens* show MIC values of 12.5 µg/mL. *Escherichia coli* and *Klebsiella pneumonia* show MIC values of 25 µg/mL. The gram positive bacterium *Staphylococcus aureus* shows a MIC value of 25µg/mL. Among fungi, *Candida parapsilosis* shows a MIC value of 12.5 µg/mL, while *Candida albicans* shows a MIC value of 25 µg/mL.

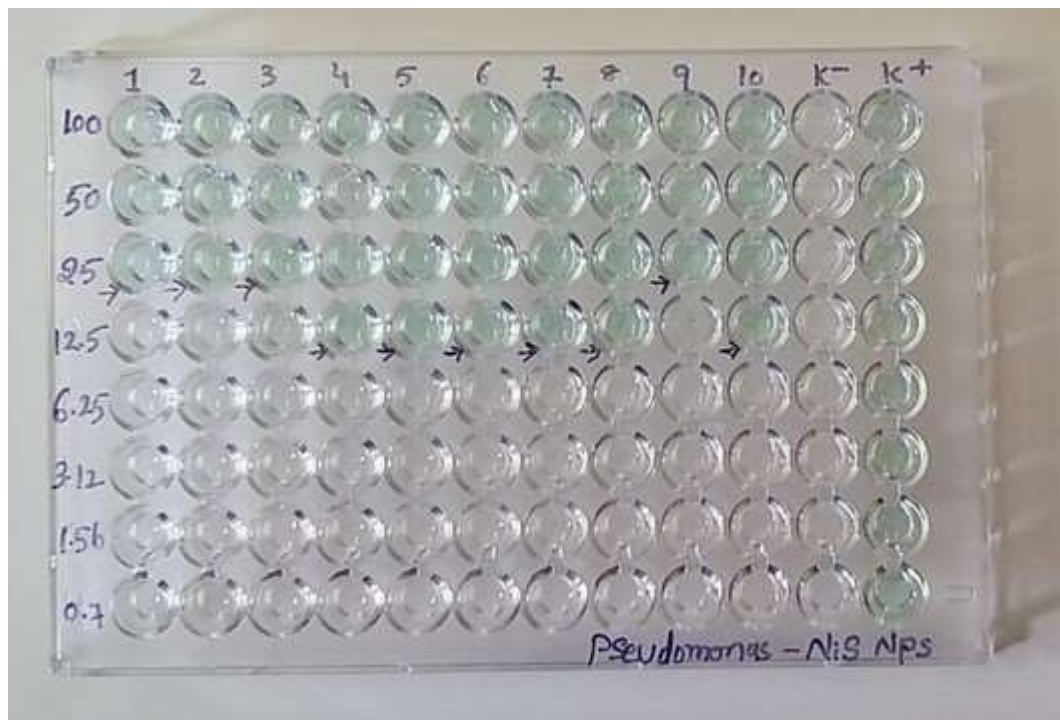

**Figure-S5.** MIC assay of the NiS NPs synthesized by *Pseudomonas* ef1 by Broth microdilution method. 1. *Staphylococcus aureus* 2. *Escherichia coli* 3. *Klebsiella pneumoniae* 4. *Pseudomonas* sp 5. *Proteus mirabilis* 6. *Citrobacter koseri* 7. *Acinetobacter baumannii* 8. *Serratia marcescens* 9. *Candida albicans* 10.

The lowest MBC value of 12.5 µg/mL among gram negative bacteria is shown by *Pseudomonas aeruginosa*, *Proteus mirabilis*, *Citrobacter koseri*, *Acinetobacter baumannii* and *Serratia marcescens*. *Escherichia coli* and *Klebsiella pneumonia* showed an MBC value of 25µg/mL. The gram positive bacterium *Staphylococcus aureus* showed an MBC of 25 µg/mL. The Fungi *Candida albicans* and *Candida parapsilosis* showed also a MFC value of 25 µg/mL.

MIC values of *Brevundimonas* synthesized NiSNPs are shown in **Figure-S6**. Among Gram-negative bacteria, *Serratia marcescens* shows the lowest MIC value of 6.25 µg/mL, whereas *Klebsiella pneumonia*, *Pseudomonas aeruginosa*, *Proteus mirabilis*, *Citrobacter koseri* and *Acinetobacter baumannii* show a MIC value of 12.5 µg/mL. *Escherichia coli* shows a MIC value of 25 µg/mL. The gram positive bacterium

*Staphylococcus aureus* shows a MIC value of 12.5  $\mu\text{g/mL}$ . The fungi *Candida albicans* and *Candida parapsilosis* showed a MIC value of 12.5  $\mu\text{g/mL}$ .

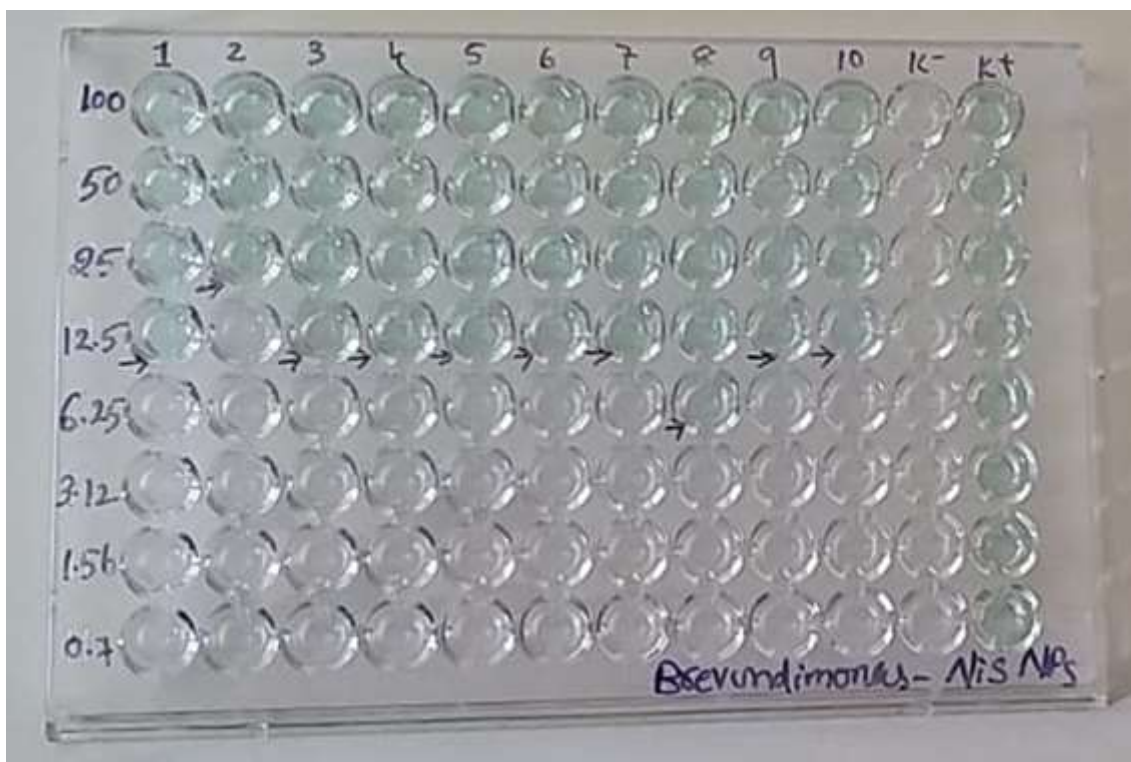

Figure S6. MIC assay of the NiS NPs synthesized by *Brevundimonas* by Broth microdilution method. 1. *Staphylococcus aureus* 2. *Escherichia coli* 3. *Klebsiella pneumoniae* 4. *Pseudomonas aeruginosa* 5. *Proteus mirabilis* 6. *Citrobacter koseri* 7. *Acinetobacter baumannii* 8. *Serratia marcescens* 9. *Candida albicans* 10. *Candida parapsilosis*

Among gram negative bacteria, the lowest MBC value of 12.5  $\mu\text{g/mL}$  is shown by *Proteus mirabilis* and *Serratia marcescens*. *Escherichia coli*, *Klebsiella pneumonia*, *Pseudomonas aeruginosa*, *Citrobacter koseri* and *Acinetobacter baumannii* show MBC values of 25  $\mu\text{g/mL}$ . The gram-positive bacterium *Staphylococcus aureus* shows a MBC of 25  $\mu\text{g/mL}$ . Also the Fungi *Candida albicans* and *Candida parapsilosis* shows MFC values of 25  $\mu\text{g/mL}$ .

MIC values of *Bacillus* synthesized NiSNPs are shown in **Figure-S7**. Among Gram-negative bacteria, *Klebsiella pneumonia*, *Proteus mirabilis* and *Serratia marcescens* show the lowest MIC values of 6.25  $\mu\text{g/mL}$ , whereas *Escherichia coli*, *Pseudomonas aeruginosa*, *Citrobacter koseri* and *Acinetobacter baumannii* show MIC values of 12.5  $\mu\text{g/mL}$ . The gram-positive bacterium *Staphylococcus aureus* shows a MIC value of 12.5  $\mu\text{g/mL}$ . Among fungi, *Candida parapsilosis* shows a MIC value of 6.25  $\mu\text{g/mL}$  whereas *Candida albicans* of 12.5  $\mu\text{g/mL}$ .



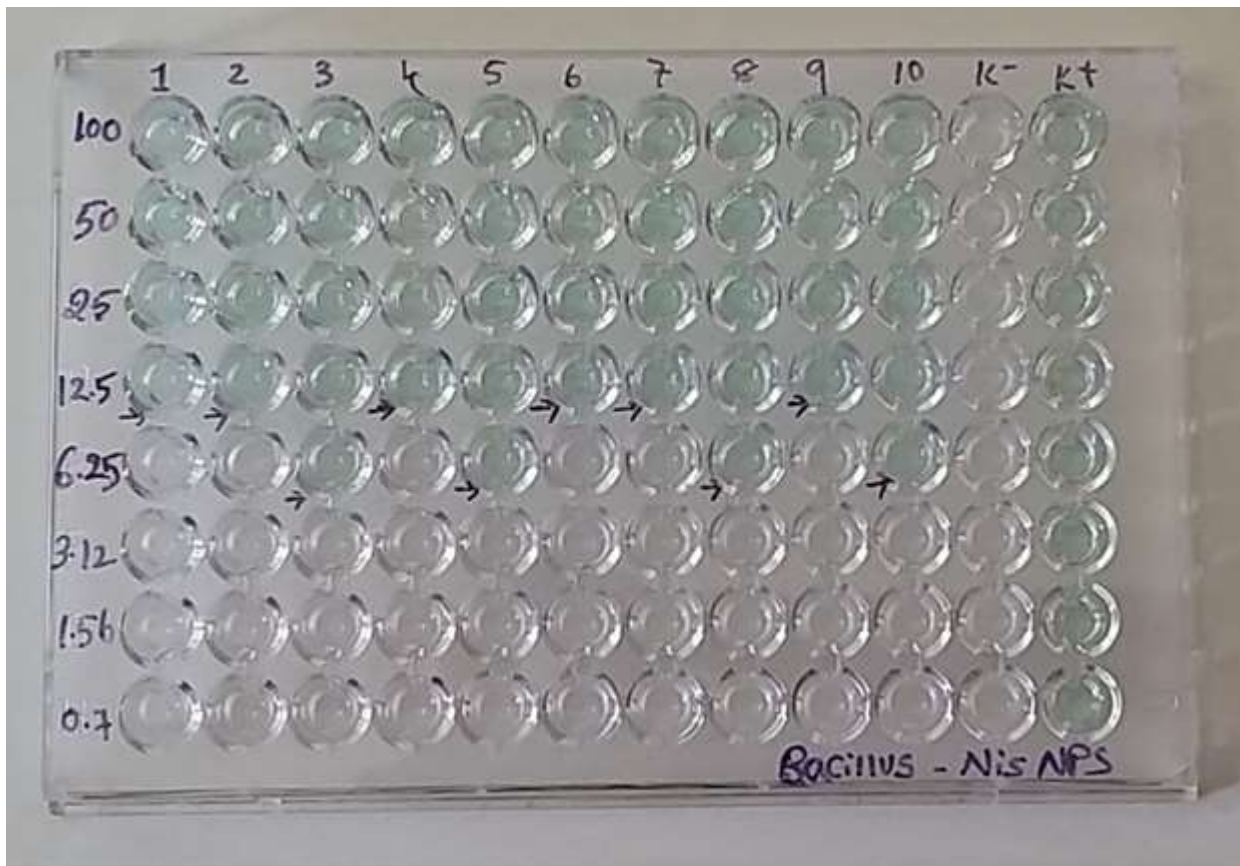

Figure-S7.MIC assay of the NiS NPs synthesized by Bacillus by Broth microdilution method.1. *Staphylococcus aureus* 2. *Escherichia coli* 3. *Klebsiella pneumoniae* 4. *Pseudomonas aeruginosa* 5. *Proteus mirabilis* 6. *Citrobacter koseri* 7. *Acinetobacter baumannii* 8. *Serratia marcescens* 9. *Candida albicans* 10. *Candida parapsilosis*

The lowest MBC value of 12.5µg/mL among the gram-negative bacteria is shown by *Escherichia coli*, *Klebsiella pneumoniae*, *Pseudomonas aeruginosa*, *Proteus mirabilis*, *Citrobacter koseri*, *Acinetobacter baumannii* and *Serratia marcescens*. The gram-positive bacterium *Staphylococcus aureus* shows a MBC of 12.5 µg/mL. The Fungi *Candida albicans* and *Candida parapsilosis* show MFC values of 25 µg/mL and 12.5 µg/mL respectively.
